# Supplementary material for: Whole Genome Sequencing of Extended Spectrum β-lactamase (ESBL)-producing Klebsiella pneumoniae Isolated from Hospitalized Patients in KwaZulu-Natal, South Africa
Source: PubMed Central journal article supplement (PMC6472517; doi:10.1038/s41598-019-42672-2), 2019-04-18
Supplement: 41598_2019_42672_MOESM1_ESM.pdf [file 41598_2019_42672_MOESM1_ESM.pdf]

## Supplementary Information

### Whole Genome Sequencing of Extended Spectrum $\beta$ -lactamase (ESBL)-producing *Klebsiella pneumoniae* Isolated from Hospitalized Patients in KwaZulu-Natal, South Africa

Raspail Carrel Founou<sup>1,2\*</sup>, Luria Leslie Founou<sup>1,3</sup>, Mushal Allam<sup>4</sup>, Arshad Ismail<sup>4</sup>, Sabiha Yusuf Essack<sup>1</sup>

<sup>1</sup>Antimicrobial Research Unit, College of Health Sciences, University of KwaZulu-Natal, Durban, South Africa

<sup>2</sup>Department of Clinical Microbiology, Centre of Expertise and Biological Diagnostic of Cameroon (CEDBCAM), Yaoundé, Cameroon

<sup>3</sup>Department of Food Safety and Environmental Microbiology, Centre of Expertise and Biological Diagnostic of Cameroon, Yaoundé, Cameroon

<sup>4</sup>Sequencing Core Facility, National Health Laboratory Service, Johannesburg, South Africa

#### \*Corresponding author:

Raspail Carrel Founou

[czangue@yahoo.fr](mailto:czangue@yahoo.fr)

Tel: +237 675 94 35 67

**Table S1. Distribution of intact prophage regions among the ESBL-producing *K. pneumoniae* strains.** a: Intact prophage region; b: Region length of intact prophage; c: Phage with the highest number of CDS in the region and the number of gene counts in brackets.

| Isolate name      | ST    | Region <sup>a</sup> | Length <sup>b</sup><br>(kb) | No<br>CDS | GC%   | Phage (hit genes count) <sup>c</sup> |
|-------------------|-------|---------------------|-----------------------------|-----------|-------|--------------------------------------|
| <b>A105R2B2</b>   | ST607 | 2                   | 31.2                        | 42        | 54.83 | Salmon SEN5 (19)                     |
|                   |       | 4                   | 41.8                        | 19        | 52.69 | Entero P4 (5)                        |
|                   |       | 5                   | 48.6                        | 45        | 51.90 | Pseudo JBD44 (11)                    |
|                   |       | 6                   | 14.6                        | 20        | 56.63 | Entero fiAA91 ss (16)                |
| <b>A111R1B2</b>   | ST17  | 1                   | 31.2                        | 43        | 53.10 | Salmon Fels 2 (32)                   |
|                   |       | 7                   | 47.1                        | 42        | 53.33 | Entero mEp235 (9)                    |
|                   |       | 9                   | 15.1                        | 19        | 55.81 | Entero P88 (12)                      |
| <b>A105R1B5</b>   | ST983 | 1                   | 60.1                        | 44        | 52.80 | Salmon 118970 sal4 (14)              |
| <b>ED01500733</b> | ST983 | 2                   | 57.2                        | 45        | 53.62 | Salmon 118970 (15)                   |
|                   |       | 3                   | 54.6                        | 78        | 49.24 | Klebsi JD001 (46)                    |
| <b>G702R3B2</b>   | ST152 | 1                   | 17.5                        | 20        | 55.37 | Entero P88 (12)                      |
|                   |       | 2                   | 30.4                        | 33        | 50.48 | Salmon 118970 (7)                    |
|                   |       | 3                   | 40.1                        | 39        | 52.46 | Klebsi phiKO2 (22)                   |
| <b>ED01503757</b> | ST152 | 1                   | 38.1                        | 38        | 53.37 | Entero mEp235 (8)                    |
|                   |       | 2                   | 15.1                        | 19        | 55.80 | Entero P88 (11)                      |
|                   |       | 3                   | 40.7                        | 31        | 52.84 | Klebsi phiKO2 (20)                   |
| <b>G702R1B5</b>   | ST152 | 1                   | 22.1                        | 26        | 52.68 | Entero P88 (10)                      |
|                   |       | 2                   | 33.1                        | 39        | 51.39 | Bacill SP 15 (10)                    |
|                   |       | 3                   | 30.1                        | 15        | 54.19 | Entero P88 (6)                       |
| <b>G702R2B5</b>   | ST152 | 1                   | 43.4                        | 51        | 51.99 | Klebsi PKP126 (9)                    |
|                   |       | 2                   | 63.3                        | 34        | 50.90 | Salmon SSU5 (19)                     |
|                   |       | 3                   | 23.3                        | 33        | 50.32 | Salmon SSU5 (11)                     |
|                   |       | 4                   | 23.2                        | 29        | 54.61 | Salmon Fels 2 (22)                   |
